# Supplementary material for: Comprehensive SPME-GC-MS Analysis of VOC Profiles Obtained Following High-Temperature Heating of Pork Back Fat with Varying Boar Taint Intensities
Source: MDPI journal article supplement (doi:10.3390/foods10061311), 2021-06-07
Supplement: s1 [file s1]

# Supplementary Materials

**Table S1.** Quantification of skatole and androstenone in fat determined by HPLC-FD. The mention < LR indicates that the content is below the linearity range (45 to 500 ng/g for skatole and 240 to 5000 ng/g for androstenone).

| Sample Number | Fat Content (ng/g of Fat) |              |
|---------------|---------------------------|--------------|
|               | Skatole                   | Androstenone |
|               | <b>Untainted fat</b>      |              |
| 1             | 54.8                      | 537.8        |
| 2             | 47.6                      | 569.8        |
| 3             | 107.5                     | 423.7        |
| 4             | <LR                       | <LR          |
| 5             | <LR                       | <LR          |
| 6             | 69.7                      | 245.9        |
| 7             | 88.9                      | 429.7        |
|               | <b>Tainted fat</b>        |              |
| 1             | <LR                       | 4036.8       |
| 2             | <LR                       | 1444.6       |
| 3             | 221.3                     | 477.2        |
| 4             | 276.1                     | 967.9        |
| 5             | 422.9                     | <LR          |
| 6             | 198.1                     | 3208.3       |
| 7             | 138.2                     | 2370.0       |
